# Supplementary material for: Impact of Geocoding Methods on Associations between Long-term Exposure to Urban Air Pollution and Lung Function
Source: PubMed Central journal article supplement (PMC3764075; doi:10.1289/ehp.1206016), 2013-07-03
Supplement: ehp.1206016.s001.pdf [file ehp.1206016.s001.pdf]

## SUPPLEMENTAL MATERIAL

### **Impact of Geocoding Methods on Associations between Long-term Exposure to Urban Air Pollution and Lung Function**

Bénédicte Jacquemin, Johanna Lepeule, Anne Boudier, Caroline Arnould, Meriem Benmerad, Claire Chappaz, Joane Ferran, Francine Kauffmann, Xavier Morelli, Isabelle Pin, Christophe Pison, Isabelle Rios, Sofia Temam, Nino Künzli, Rémy Slama, and Valérie Siroux.

#### **Table of contents:**

Page 2 Table S1: Median (min, 25th centile, 75th centile, max) of the mean annual pollutant concentration ( $\mu\text{g}/\text{m}^3$ ) differences between the building matching geocodes and each spatial interpolation geocodes, n=354

Page 2 Table S2: Correlation (Spearman) between the pollutant concentrations according to the different geocoding techniques, n=354

Page 3 Table S3: Median (minimum, 25th centile, 75th centile and maximum) annual pollutant concentrations using the building matching geocoding technique by survey (n=354)

Page 3 Table S4: Median annual (minimum, 25th centile, 75th centile and maximum) pollutant concentrations using the building matching geocoding technique by asthma status (n=354)

Page 4 Table S5: Associations between air pollution and lung function per one increase of one interquartile range in air pollutants levels ( $5.2 \mu\text{g}/\text{m}^3$  for NO<sub>2</sub> and  $3.0 \mu\text{g}/\text{m}^3$  for PM<sub>10</sub>) estimated using matching building.

Page 5 Table S6: Associations between air pollution and lung function per one increase of one interquartile range in air pollutants levels ( $5.2 \mu\text{g}/\text{m}^3$  for NO<sub>2</sub> and  $3.0 \mu\text{g}/\text{m}^3$  for PM<sub>10</sub>) stratified by asthma status.

Page 6 Table S7: Associations between air pollution and lung function per one increase of one interquartile range in air pollutants levels ( $5.2 \mu\text{g}/\text{m}^3$  for NO<sub>2</sub> and  $3.0 \mu\text{g}/\text{m}^3$  for PM<sub>10</sub>) stratified by study.

Page 7 Table S8: Associations between air pollution and lung function per one increase of one interquartile range in air pollutants levels ( $5.2 \mu\text{g}/\text{m}^3$  for NO<sub>2</sub> and  $3.0 \mu\text{g}/\text{m}^3$  for PM<sub>10</sub>), with 12-months back-extrapolated air pollution estimates, without back-extrapolation (as estimated by the SIRANE 2004 model for NO<sub>2</sub> and the SIRANE 2008 model for PM<sub>10</sub>) and with 24-month back-extrapolated air pollution estimates (12 months before and after lung function testing)

Page 8 Figure S1: Description of the study population

Page 9 Figure S2: Mean annual NO<sub>2</sub> concentration estimated by the SIRANE dispersion model in 2004 in Grenoble, France

Page 10 Figure S3: Map showing the participant's distribution in the Grenoble area, taking into account the study they come from

**Table S1:** Median (min, 25<sup>th</sup> centile, 75<sup>th</sup> centile, max) of the mean annual pollutant concentration ( $\mu\text{g}/\text{m}^3$ ) differences between the building matching geocodes and each spatial interpolation geocodes, n=354

|                        | A. Building matching versus B.NavTEQ | A. Building matching versus B. Google Maps | A. Building matching versus C.Multimap |
|------------------------|--------------------------------------|--------------------------------------------|----------------------------------------|
| <b>NO<sub>2</sub></b>  |                                      |                                            |                                        |
| min                    | -20.8                                | -20.8                                      | -20.8                                  |
| 25th centile           | -1.7                                 | -1.4                                       | -2.2                                   |
| median                 | -0.1                                 | -0.1                                       | -0.2                                   |
| 75th centile           | 0.1                                  | 0.1                                        | 0.1                                    |
| max                    | 21                                   | 15.5                                       | 19                                     |
| <b>PM<sub>10</sub></b> |                                      |                                            |                                        |
| min                    | -5                                   | -4.3                                       | -4.6                                   |
| 25th centile           | -0.5                                 | -0.4                                       | -0.7                                   |
| median                 | -0.2                                 | 0                                          | -0.1                                   |
| 75th centile           | 0                                    | 0                                          | 0                                      |
| max                    | 5.4                                  | 4.1                                        | 5.9                                    |

**Table S2:** Correlation (Spearman) between the pollutant concentrations according to the different geocoding techniques, n=354

| PM <sub>10</sub>     | NO <sub>2</sub>      |           |                |             |
|----------------------|----------------------|-----------|----------------|-------------|
|                      | A. Building matching | B. NavTEQ | C. Google Maps | D. Multimap |
| A. Building matching | -                    | 0.76      | 0.82           | 0.75        |
| B. NavTEQ            | 0.89                 | -         | 0.82           | 0.83        |
| C. Google Maps       | 0.91                 | 0.90      | -              | 0.83        |
| D. Multimap          | 0.88                 | 0.89      | 0.91           | -           |

**Table S3:** Median (minimum, 25th centile, 75th centile and maximum) annual pollutant concentrations using the building matching geocoding technique by survey (n=354)

|                               | NO <sub>2</sub> , µg/m <sup>3</sup> | PM <sub>10</sub> , µg/m <sup>3</sup> |
|-------------------------------|-------------------------------------|--------------------------------------|
| <b>ECRHS</b>                  |                                     |                                      |
| Min                           | 25.1                                | 27.5                                 |
| 25th centile                  | 29.6                                | 28.6                                 |
| Median                        | 31.3                                | 29.1                                 |
| 75th centile                  | 34.1                                | 29.8                                 |
| Max                           | 53.8                                | 34.9                                 |
| <b>EGEA</b>                   |                                     |                                      |
| Min                           | 27.8                                | 29.5                                 |
| 25th centile                  | 33                                  | 31                                   |
| Median                        | 34.4                                | 32.1                                 |
| 75th centile                  | 37.2                                | 33.2                                 |
| Max                           | 58.2                                | 39.8                                 |
| p value (non-parametric test) | <0.001                              | <0.001                               |

**Table S4:** Median (minimum, 25th centile, 75th centile and maximum) annual pollutant concentrations using the building matching geocoding technique by asthma status (n=354)

|                                          | NO <sub>2</sub> , µg/m <sup>3</sup> | PM <sub>10</sub> , µg/m <sup>3</sup> |
|------------------------------------------|-------------------------------------|--------------------------------------|
| <b>Among participants with asthma</b>    |                                     |                                      |
| Min                                      | 25.7                                | 27.5                                 |
| 25th centile                             | 30.7                                | 29.0                                 |
| Median                                   | 32.9                                | 30.3                                 |
| 75th centile                             | 35.9                                | 32.0                                 |
| Max                                      | 58.2                                | 39.8                                 |
| <b>Among participants without asthma</b> |                                     |                                      |
| Min                                      | 26.7                                | 27.7                                 |
| 25th centile                             | 31.3                                | 29.7                                 |
| Median                                   | 33.8                                | 30.9                                 |
| 75th centile                             | 35.9                                | 32.7                                 |
| Max                                      | 56.5                                | 38.4                                 |
| p value <sup>a</sup>                     | 0.18                                | 0.02                                 |

<sup>a</sup> p-value comparing participants with and without asthma using Kruskal and Wallis test for pollutants.

**Table S5:** Associations between air pollution and lung function per one increase of one interquartile range in air pollutants levels (5.2  $\mu\text{g}/\text{m}^3$  for  $\text{NO}_2$  and 3.0  $\mu\text{g}/\text{m}^3$  for  $\text{PM}_{10}$ ) estimated using matching building.

|                                 | FEV <sub>1</sub> % predict |      | FVC % predict        |      |
|---------------------------------|----------------------------|------|----------------------|------|
|                                 | Beta (CI 95%)              | P    | Beta (CI 95%)        | p    |
| <b>Model 0</b>                  |                            |      |                      |      |
| a- Annual mean $\text{NO}_2$    | -1.13 (-2.70, 0.44)        | 0.16 | -0.39 (-1.82, 1.04)  | 0.60 |
| b- Annual mean $\text{PM}_{10}$ | -1.11 (-3.32, 1.10)        | 0.33 | 0.62 (-1.40, 2.64)   | 0.55 |
| c- $\text{NO}_2$ lag 0          | 0.08 (-1.57, 1.73)         | 0.92 | -0.29 (-1.76, 1.18)  | 0.70 |
| d- $\text{PM}_{10}$ lag 0       | -0.92 (-2.98, 1.14)        | 0.38 | -0.32 (-3.26, -0.16) | 0.74 |
| <b>Model 1</b>                  |                            |      |                      |      |
| a- Annual mean $\text{NO}_2$    | -1.65 (-3.34, 0.04)        | 0.05 | -1.71 (-3.26, -0.16) | 0.03 |
| b- Annual mean $\text{PM}_{10}$ | -3.95 (-7.09, -0.81)       | 0.01 | -3.99 (-6.87, -1.11) | 0.01 |
| <b>Model 2</b>                  |                            |      |                      |      |
| a- Annual mean $\text{NO}_2$    | -1.62 (-3.31, 0.07)        | 0.06 | -1.69 (-3.14, -0.14) | 0.03 |
| $\text{NO}_2$ lag 0             | -0.61 (-2.39, 1.17)        | 0.50 | -0.88 (-2.49, 0.73)  | 0.28 |
| b- Annual mean $\text{PM}_{10}$ | -3.72 (-6.88, -0.56)       | 0.02 | -3.86 (-6.76, -0.96) | 0.01 |
| $\text{PM}_{10}$ lag 0          | -1.08 (-3.22, 1.06)        | 0.32 | -0.67 (-2.65, 1.31)  | 0.51 |

Model 0: Crude (n=354 for model a and b, n=343 for model c and n=349 for model d)

Model 1: Adjusted on sex, age, BMI, active and passive smoking, occupational group, allergic sensitization, survey and asthma (n= 321)

Model 2: Further adjustment on the pollutant level at lag 0<sup>†</sup> (n=310 for model a and n=316 for model b)

**Table S6:** Associations between air pollution and lung function per one increase of one interquartile range in air pollutants levels (5.2  $\mu\text{g}/\text{m}^3$  for  $\text{NO}_2$  and 3.0  $\mu\text{g}/\text{m}^3$  for  $\text{PM}_{10}$ ) stratified by asthma status.

|                        | FEV1 % predicted |               |      |                |                |      | FVC% predicted |               |      |                |                |      |
|------------------------|------------------|---------------|------|----------------|----------------|------|----------------|---------------|------|----------------|----------------|------|
|                        | Asthmatics       |               |      | Non asthmatics |                |      | Asthmatics     |               |      | Non asthmatics |                |      |
|                        | Beta             | (CI95%)       | p    | Beta           | (CI95%)        | p    | Beta           | (CI95%)       | p    | Beta           | (CI95%)        | p    |
| <b>NO<sub>2</sub></b>  |                  |               |      |                |                |      |                |               |      |                |                |      |
| A. Building matching   | -0.78            | (-3.86, 2.31) | 0.62 | -1.89          | (-3.85, 0.07)  | 0.06 | -2.29          | (-4.74, 0.15) | 0.07 | -1.89          | (-3.78, 0.00)  | 0.05 |
| B. NavTEQ              | -0.46            | (-3.03, 2.12) | 0.72 | -1.86          | (-3.49, -0.24) | 0.02 | -0.86          | (-2.93, 1.20) | 0.41 | -2.08          | (-3.65, -0.52) | 0.01 |
| C. Google Map          | 0.14             | (-2.21, 2.49) | 0.90 | -1.33          | (-2.89, 0.24)  | 0.10 | -0.44          | (-2.33, 1.44) | 0.64 | -1.39          | (-2.90, 0.12)  | 0.07 |
| D. Multimap            | -0.50            | (-2.61, 1.60) | 0.64 | -1.19          | (-2.59, 0.22)  | 0.10 | -0.97          | (-2.63, 0.69) | 0.25 | -1.48          | (-2.83, -0.12) | 0.03 |
| <b>PM<sub>10</sub></b> |                  |               |      |                |                |      |                |               |      |                |                |      |
| A. Building matching   | -3.10            | (-9.41, 3.21) | 0.33 | -3.30          | (-6.92, 0.31)  | 0.07 | -4.19          | (-9.23, 0.84) | 0.10 | -3.75          | (-7.27, -0.22) | 0.04 |
| B. NavTEQ              | -2.40            | (-8.19, 3.38) | 0.41 | -2.51          | (-5.62, 0.59)  | 0.11 | -1.54          | (-6.26, 3.17) | 0.52 | -3.18          | (-6.21, -0.16) | 0.04 |
| C. Google Map          | -1.03            | (-6.89, 4.83) | 0.73 | -1.67          | (-4.73, 1.39)  | 0.28 | -1.35          | (-6.11, 3.41) | 0.57 | -2.18          | (-5.17, 0.81)  | 0.15 |
| D. Multimap            | -2.21            | (-7.08, 2.66) | 0.37 | -1.50          | (-4.31, 1.31)  | 0.29 | -2.52          | (-6.41, 1.38) | 0.20 | -2.32          | (-5.06, 0.42)  | 0.10 |

Adjusted for: sex, age, BMI, active smoking, ETS, occupational group, atopy, level of pollutant exposure the day of examination, study and ICS for asthmatics only

$\text{NO}_2$  analyses include 79 participants with asthma and 231 without asthma,  $\text{PM}_{10}$  analyses include 79 with asthma and 237 without asthma.

**Table S7:** Associations between air pollution and lung function per one increase of one interquartile range in air pollutants levels (5.2  $\mu\text{g}/\text{m}^3$  for  $\text{NO}_2$  and 3.0  $\mu\text{g}/\text{m}^3$  for  $\text{PM}_{10}$ ) stratified by study.

|                        | FEV1 % predicted |                |      |       |                 |      | FVC% predicted |                |      |       |                |      |
|------------------------|------------------|----------------|------|-------|-----------------|------|----------------|----------------|------|-------|----------------|------|
|                        | ECRHS            |                |      | EGEA  |                 |      | ECRHS          |                |      | EGEA  |                |      |
|                        | Beta             | (CI95%)        | p    | Beta  | (CI95%)         | p    | Beta           | (CI95%)        | p    | Beta  | (CI95%)        | p    |
| <b>NO<sub>2</sub></b>  |                  |                |      |       |                 |      |                |                |      |       |                |      |
| A. Building matching   | -1.30            | (-3.51, 0.92)  | 0.25 | -2.59 | (-5.34, 0.17)   | 0.06 | -1.89          | (-3.97, 0.18)  | 0.07 | -1.88 | (-4.24, 0.48)  | 0.12 |
| B. NavTEQ              | -2.09            | (-3.98, -0.20) | 0.03 | -1.30 | (-3.46, 0.86)   | 0.23 | -2.14          | (-3.92, -0.36) | 0.02 | -1.15 | (-2.99, 0.70)  | 0.22 |
| C. Google Map          | -1.14            | (-2.99, 0.82)  | 0.23 | -0.86 | (-2.83, 1.11)   | 0.39 | -1.54          | (-3.28, 0.20)  | 0.08 | -0.52 | (-2.20, 1.16)  | 0.54 |
| D. Multimap            | -1.36            | (-2.96, 0.23)  | 0.09 | -0.75 | (-2.52, 1.02)   | 0.40 | -1.55          | (-3.05, -0.05) | 0.04 | -0.76 | (-2.26, 0.75)  | 0.32 |
| <b>PM<sub>10</sub></b> |                  |                |      |       |                 |      |                |                |      |       |                |      |
| A. Building matching   | -2.43            | (-7.07, 2.21)  | 0.30 | -5.42 | (-10.03, -0.80) | 0.02 | -3.22          | (-7.64, 1.20)  | 0.15 | -4.73 | (-8.75, -0.71) | 0.02 |
| B. NavTEQ              | -3.08            | (-7.19, 1.04)  | 0.14 | -3.14 | (-7.13, 0.85)   | 0.12 | -2.73          | (-6.66, 1.20)  | 0.17 | -3.09 | (-6.56, 0.38)  | 0.08 |
| C. Google Map          | -1.29            | (-5.28, 2.69)  | 0.52 | -2.77 | (-6.82, 1.29)   | 0.18 | -1.93          | (-5.73, 1.86)  | 0.32 | -2.39 | (-5.94, 1.16)  | 0.18 |
| D. Multimap            | -1.76            | (-5.25, 1.73)  | 0.32 | -2.40 | (-5.98, 1.19)   | 0.19 | -1.91          | (-5.25, 1.41)  | 0.26 | -2.62 | (-5.74, 0.49)  | 0.10 |

Adjusted for: sex, age, BMI, active smoking, ETS, occupational group, atopy, level of pollutant exposure the day of examination and asthma

$\text{NO}_2$  analyses include 169 ECHRS participants and 141 EGEA participants,  $\text{PM}_{10}$  analyses include 176 ECHRS participants and 140 EGEA participants.

**Table S8:** Associations between air pollution and lung function per one increase of one interquartile range in air pollutants levels (5.2  $\mu\text{g}/\text{m}^3$  for  $\text{NO}_2$  and 3.0  $\mu\text{g}/\text{m}^3$  for  $\text{PM}_{10}$ ), with 12-months back-extrapolated air pollution estimates, without back-extrapolation (as estimated by the SIRANE 2004 model for  $\text{NO}_2$  and the SIRANE 2008 model for  $\text{PM}_{10}$ ) and with 24-month back-extrapolated air pollution estimates (12 months before and after lung function testing)

|                                              | FEV <sub>1</sub> % predict |      | FVC % predict        |      |
|----------------------------------------------|----------------------------|------|----------------------|------|
|                                              | Beta (CI 95%)              | P    | Beta (CI 95%)        | p    |
| <b>12-month average exposure<sup>a</sup></b> |                            |      |                      |      |
| Annual mean $\text{NO}_2$                    | -1.00 (-2.59, 0.59)        | 0.22 | -1.08 (-2.50, 0.34)  | 0.13 |
| Annual mean $\text{PM}_{10}$                 | -3.15 (-6.15, -0.14)       | 0.04 | -2.97 (-5.64, -0.29) | 0.03 |
| <b>No back-extrapolation<sup>b</sup></b>     |                            |      |                      |      |
| Annual mean $\text{NO}_2$                    | -1.29 (-2.91, 0.33)        | 0.12 | -1.37 (-2.86, 0.12)  | 0.07 |
| Annual mean $\text{PM}_{10}$                 | -2.50 (-7.31, 2.31)        | 0.31 | -2.98 (-7.41, 1.45)  | 0.19 |
| <b>24-month average exposure<sup>c</sup></b> |                            |      |                      |      |
| Annual mean $\text{NO}_2$                    | -1.33 (-2.96, 0.29)        | 0.11 | -1.41 (-2.91, 0.09)  | 0.06 |
| Annual mean $\text{PM}_{10}$                 | -2.94 (-6.68, 0.79)        | 0.12 | -3.40 (-6.84, 0.03)  | 0.05 |

All estimates adjusted for sex, age, BMI, active smoking, ETS, occupational group, atopy study and asthma (Model 2)

<sup>a</sup> Using the 12-month back-extrapolated air pollution estimates (results reported in the article)

<sup>b</sup> Using air pollution concentration estimated by the SIRANE model without back-extrapolation

<sup>c</sup> Using the 24-month back-extrapolated air pollution estimates (12 months before and after lung function testing)

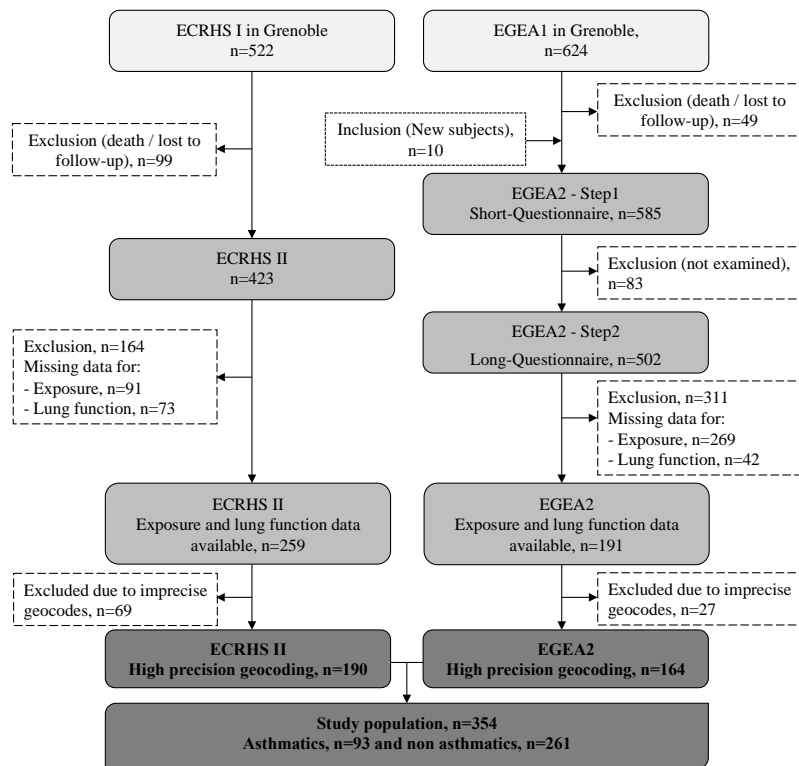

**Figure S1:** Description of the study population



Grid of the SIRANE dispersion model (2004)  
Grenoble Metropolitan Area

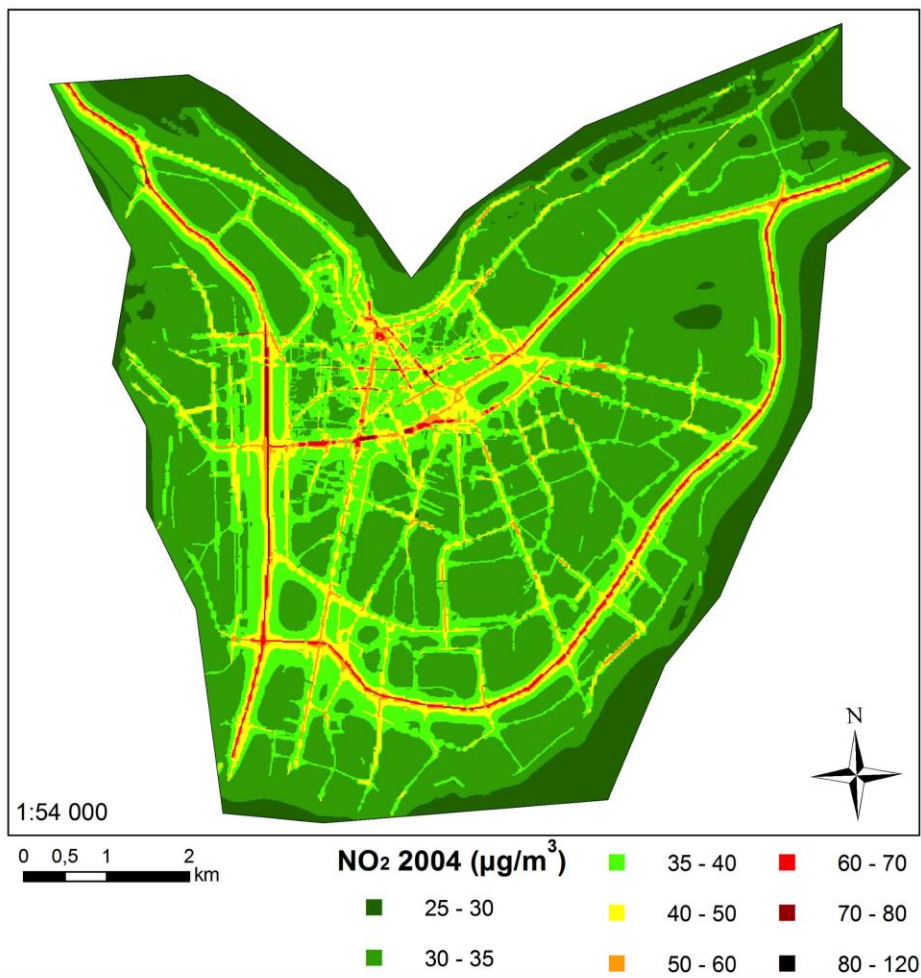

**Figure S2:** Mean annual NO<sub>2</sub> concentration estimated by the SIRANE dispersion model in 2004 in Grenoble, France.

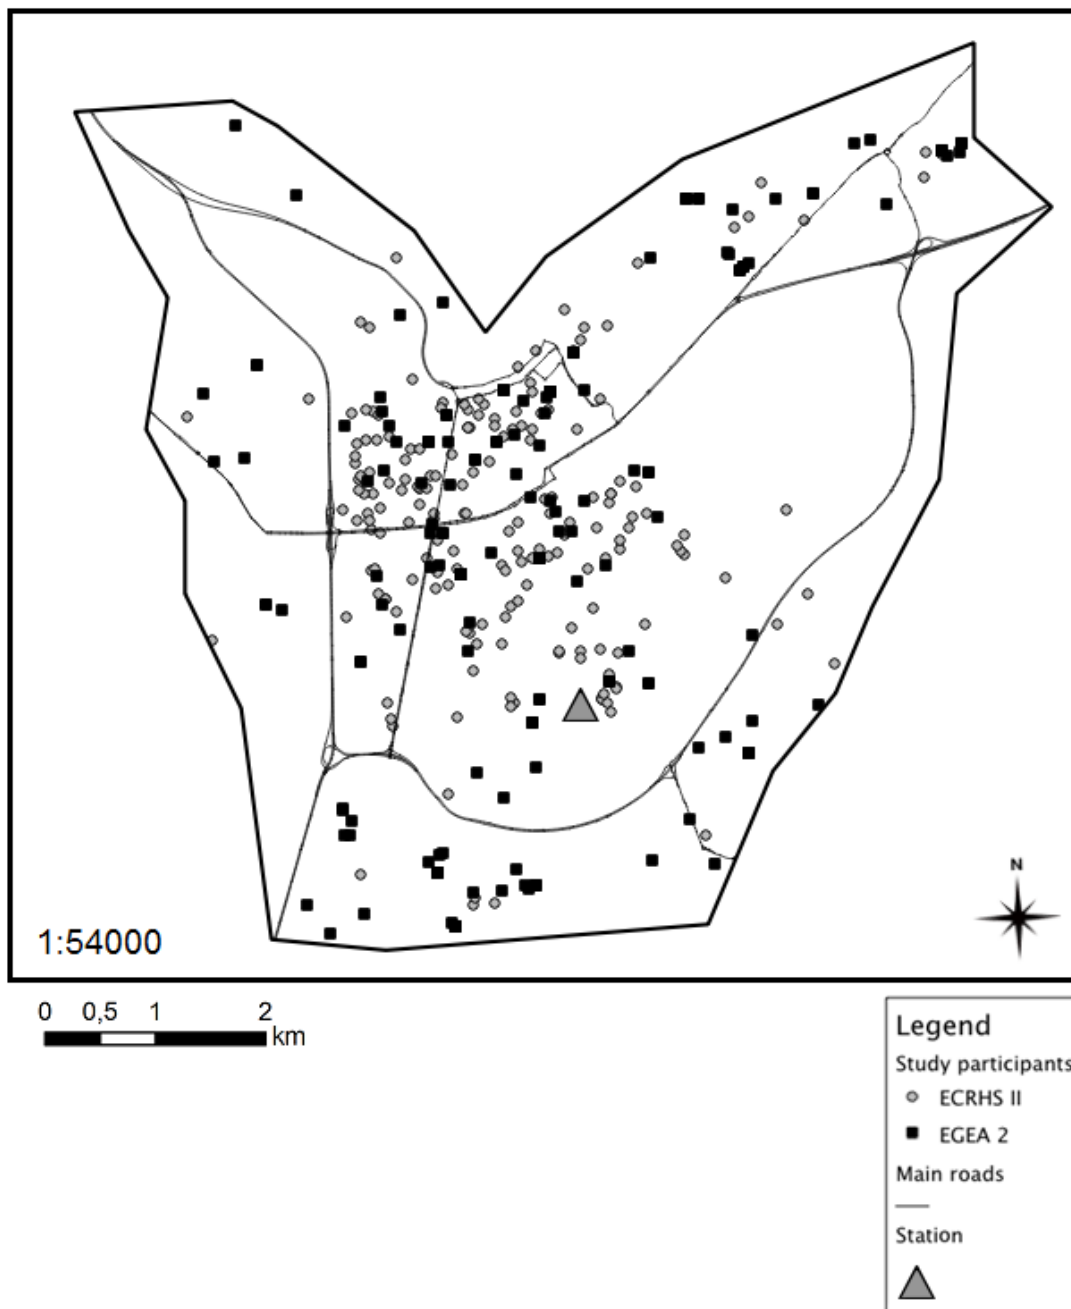

**Figure S3:** Map showing the participant's distribution in the Grenoble area, taking into account the study they come from. Station refers to the Villeneuve les Frênes background fixed monitoring station.
